# Supplementary material for: Copper-assisted anticancer activity of hydroxycinnamic acid terpyridine conjugates on triple-negative breast cancer
Source: Royal Society of Chemistry journal article supplement (doi:10.1039/d4dt02516d), 2024-01-01
Supplement: d4dt02516d1.pdf [file d4dt02516d1.pdf]

# Copper-assisted anti-cancer activity of hydroxycinnamic acid terpyridine conjugates on triple-negative breast cancer

*Anindya Roy<sup>a</sup>, Sajmina Khatun<sup>b</sup>, Prashant Dattatraya Dewale<sup>a</sup>, Aravind Kumar Rengan<sup>b</sup> and  
Jugun Prakash Chinta<sup>a\*</sup>*

<sup>a</sup>Department of Chemistry, National Institute of Technology Warangal, Warangal, Telangana  
506004, India.

<sup>b</sup>Department of Biomedical Engineering, Indian Institute of Technology Hyderabad, Hyderabad  
5022854, India.

## Electronic Supplementary Information

### Table of Contents

- S1.** <sup>1</sup>H NMR spectrum of **2** in DMSO – d<sub>6</sub>
- S2.** <sup>13</sup>C NMR spectrum of **2** in DMSO – d<sub>6</sub>
- S3.** ESI Mass spectrum of **2**
- S4.** <sup>1</sup>H NMR spectrum of **3** in DMSO – d<sub>6</sub>
- S5.** <sup>13</sup>C NMR spectrum of **3** in DMSO – d<sub>6</sub>
- S6.** ESI Mass spectrum of **3**
- S7.** ESI-MS spectra of **4** and **5**
- S8.** UV - Visible spectra of **2**, **3**, **4**, and **5** in Methanol
- S9.** Solid state FT-IR spectra of **2**, **3**, **4**, and **5**
- S10.** DPPH Radical scavenging assay
- S11.** *ct*-DNA binding studies (Dye displacement studies)

- S12. *ct*-DNA binding studies (UV-Visible absorbance studies)
- S13. *ct*-DNA binding studies (*ct*-DNA melting studies)
- S14. *ct*-DNA binding studies (Circular Dichroism studies)
- S15. Live-dead imaging of 4T1 cells treated with **4** and **5**
- S16. Clonogenic assay in 4T1 cells treated with **4** and **5**
- S17. HPLC traces of **4**
- S18. HPLC traces of **5**
- S19. HPLC traces of **Cu-1**
- S20. Stability of **4** & **5** in TE Buffer

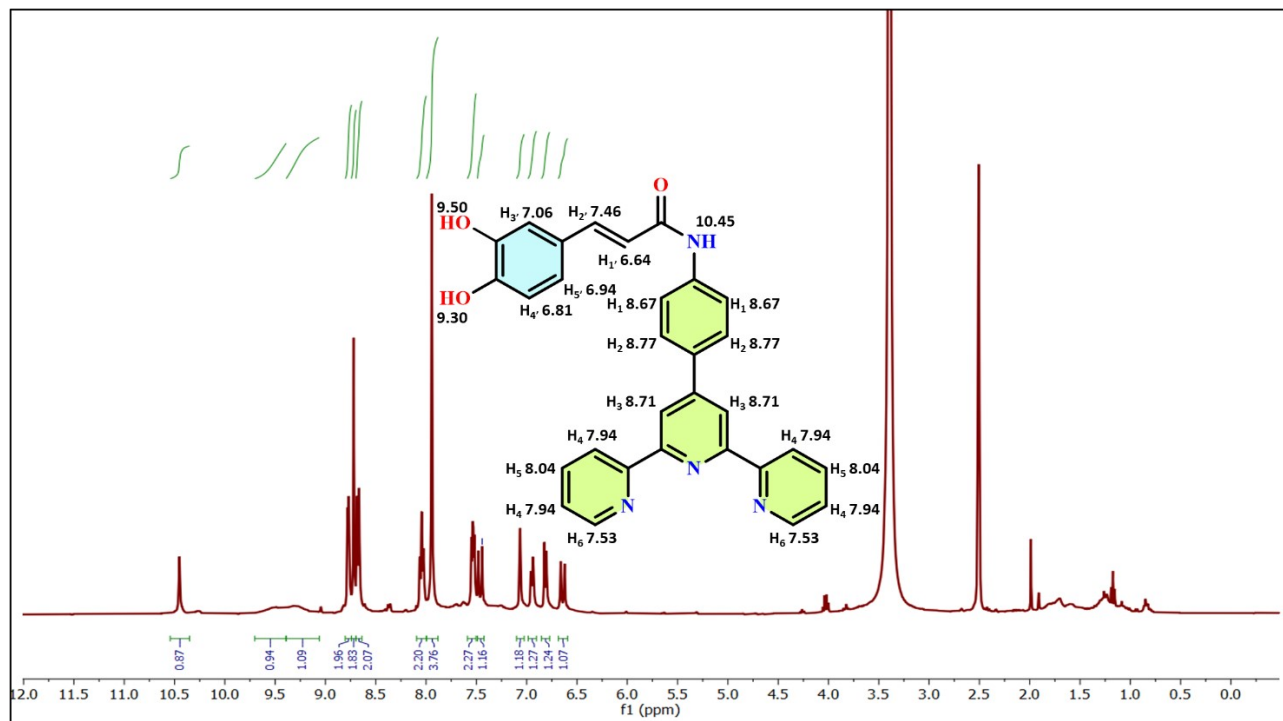

**Figure S1.** <sup>1</sup>H NMR (400 MHz) spectrum of **2** in DMSO – d<sub>6</sub>.

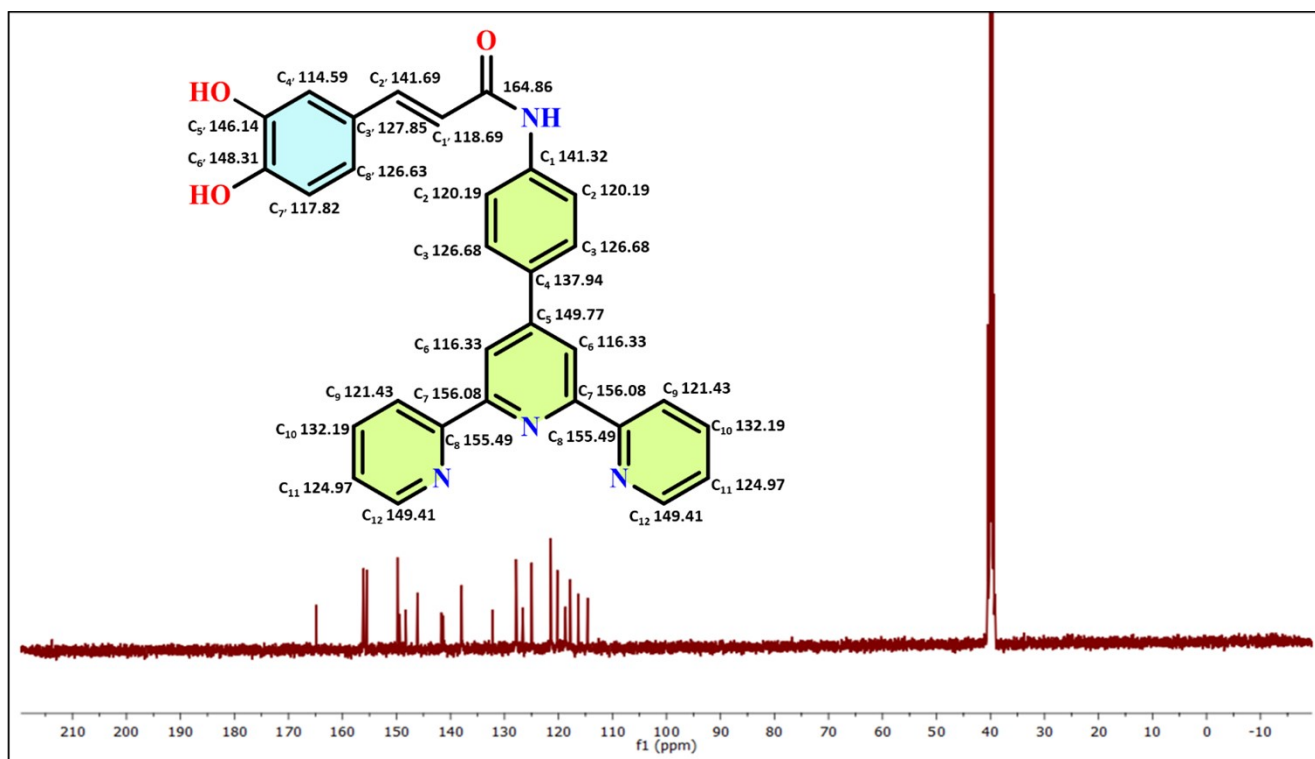

**Figure S2.**  $^{13}\text{C}$  NMR (400 MHz) spectrum of **2** in  $\text{DMSO} - d_6$ .

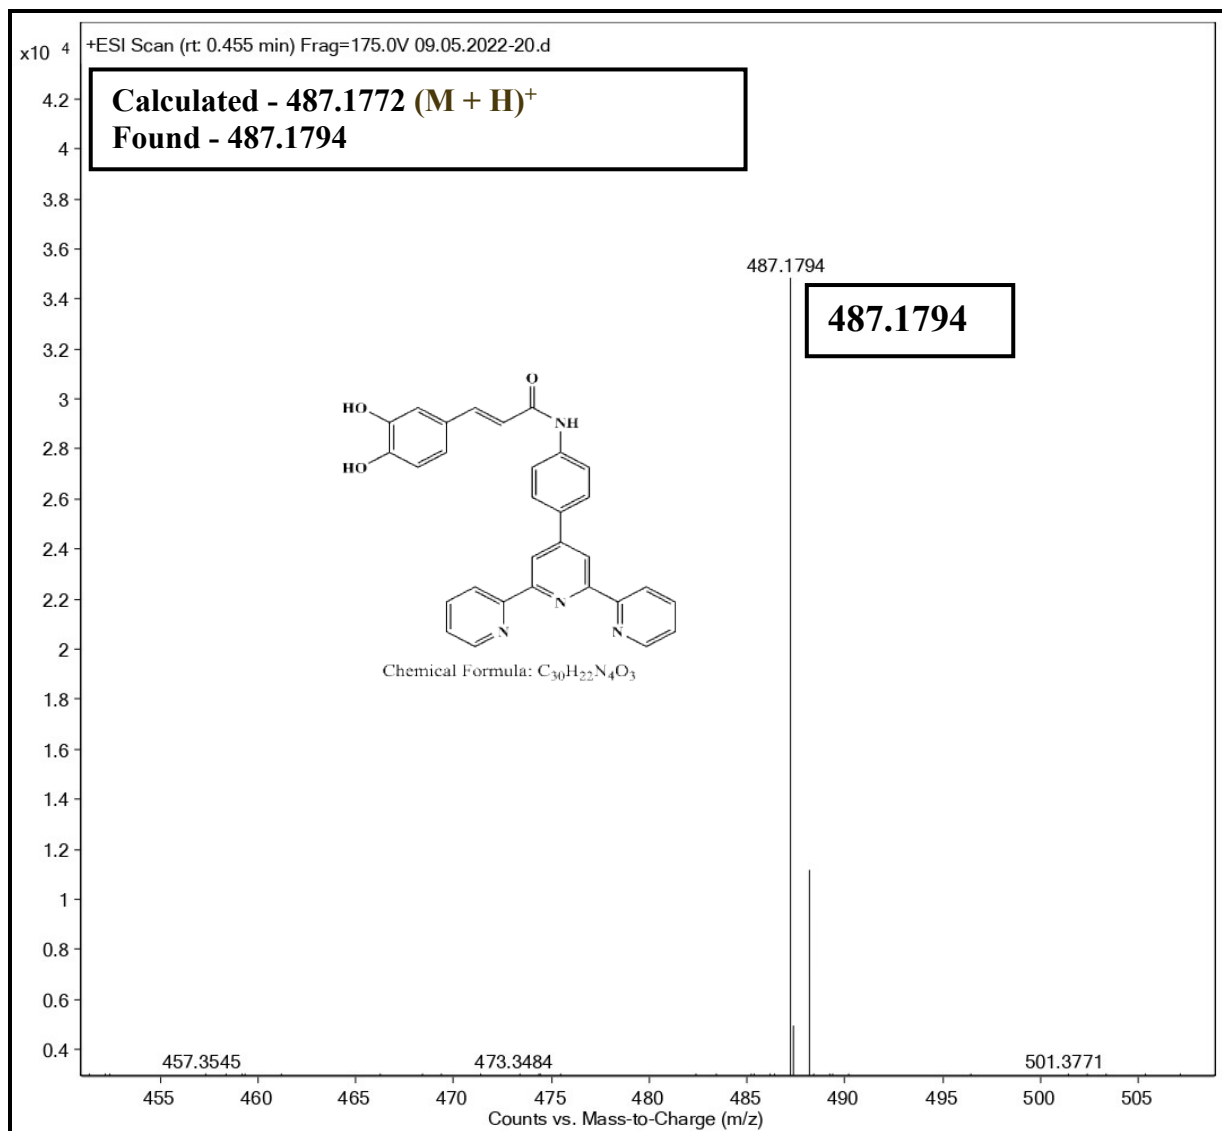

**Figure S3.** ESI-MS spectrum of **2**.

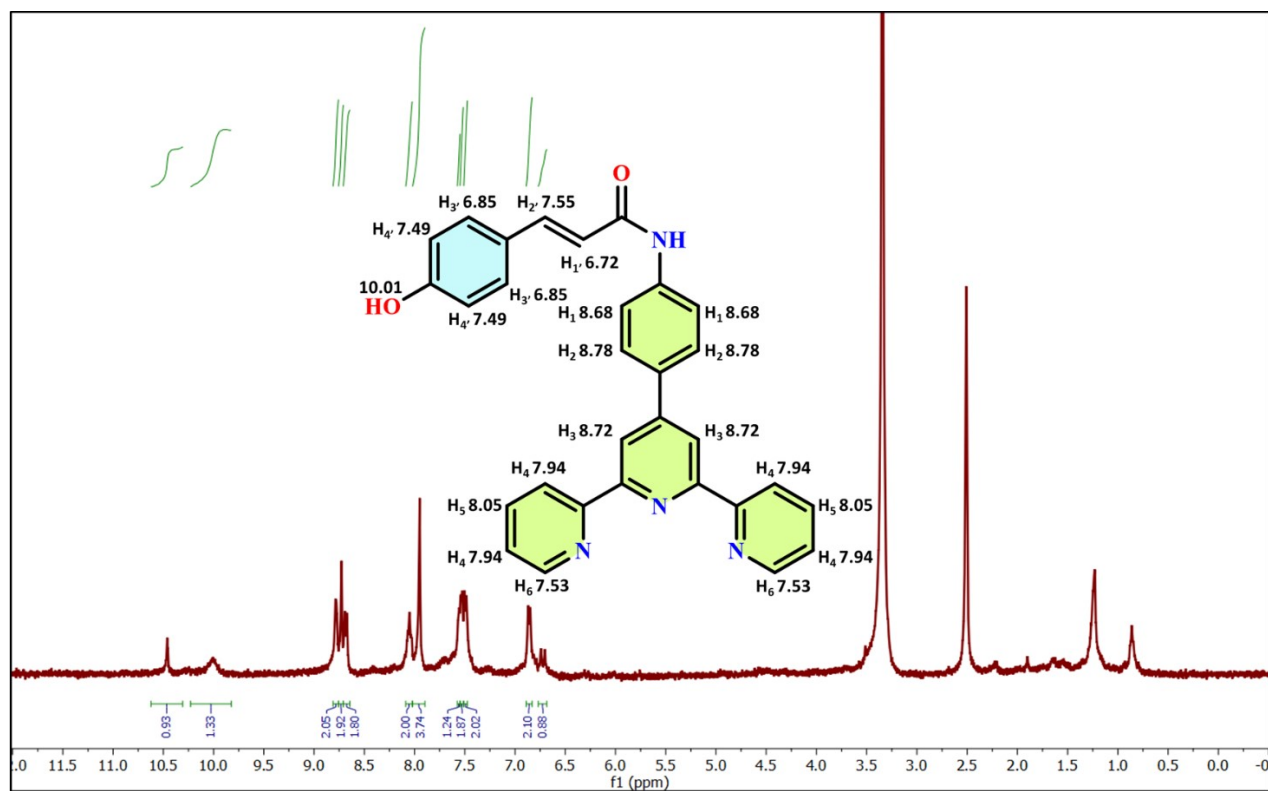

**Figure S4.**  $^1\text{H}$  NMR (400 MHz) spectrum of **3** in  $\text{DMSO}-d_6$ .

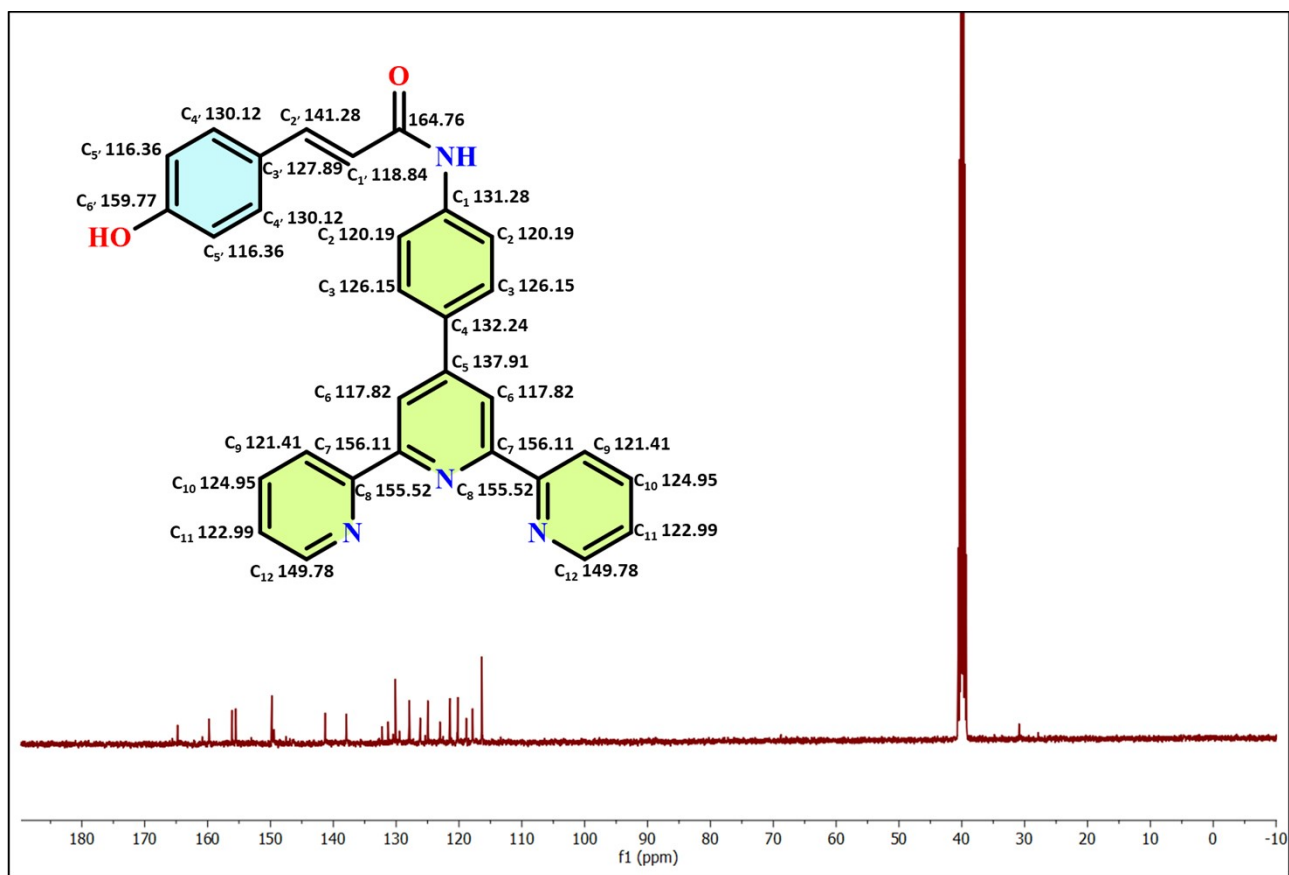

**Figure S5.**  $^{13}\text{C}$  NMR (400 MHz) spectrum of **3** in  $\text{DMSO} - d_6$ .

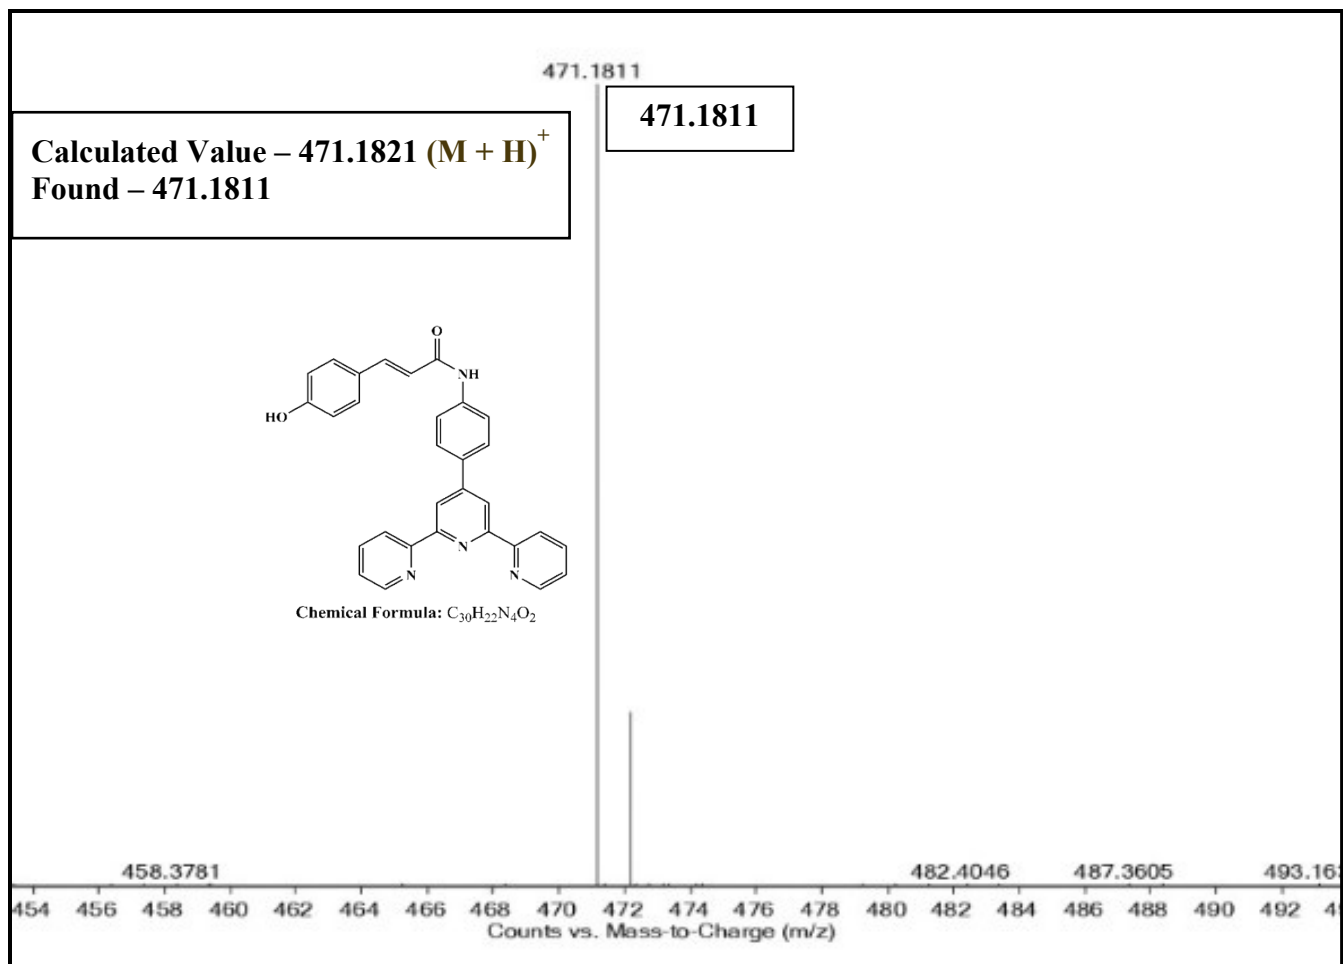

Figure S6. ESI-MS spectrum of 3.

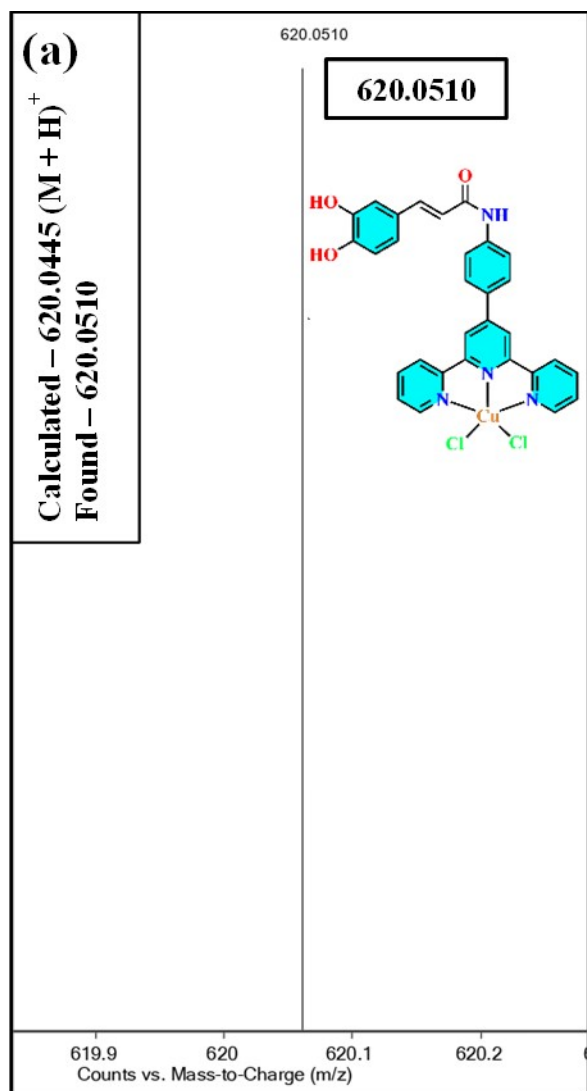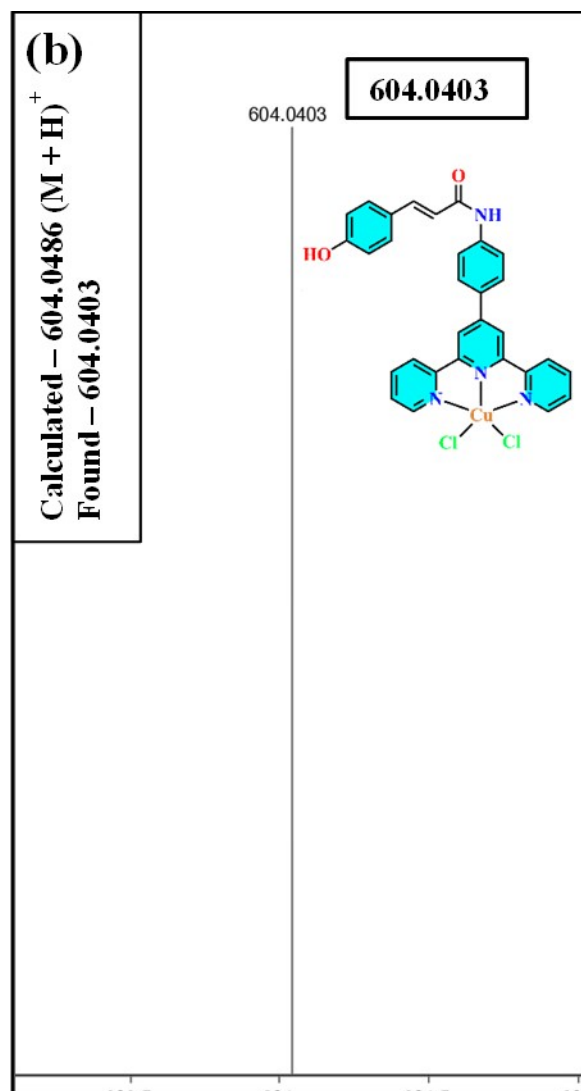

Figure S7. ESI-MS spectra of (a) **4** and (b) **5**.



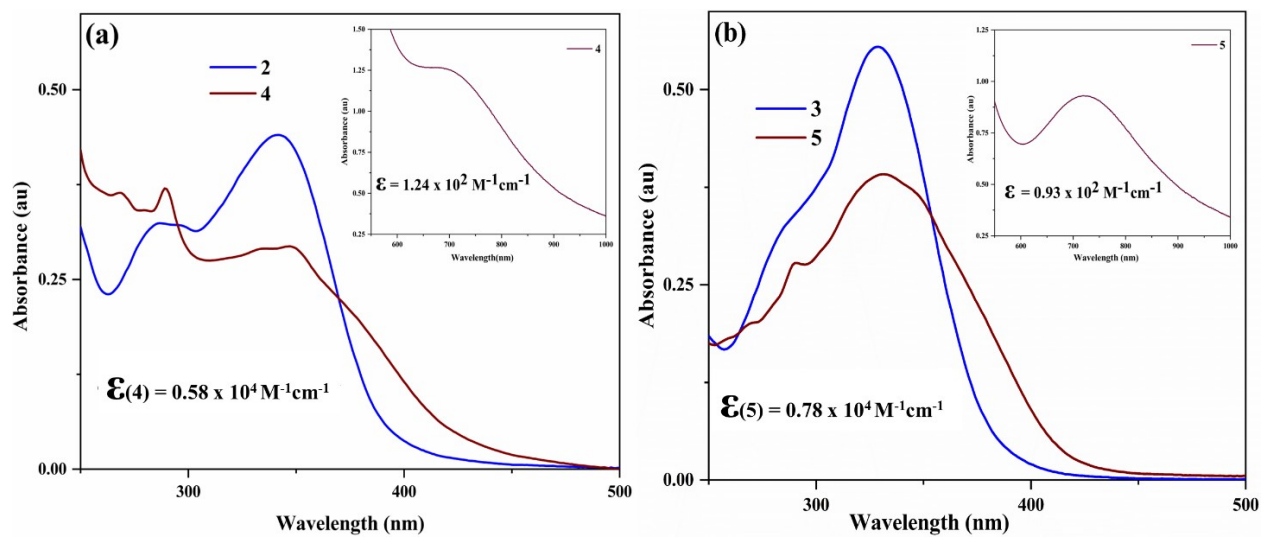

**Figure S8.** UV - visible spectra of (a) 2 [50  $\mu\text{M}$ ], 4 [50  $\mu\text{M}$ ] in Methanol and Characteristic d-d transition spectrum of 4 [10 mM] in DMSO (Inset), (b) 3 [50  $\mu\text{M}$ ], 5 [50  $\mu\text{M}$ ] in Methanol and Characteristic dd transition spectrum of 5 [10 mM] in DMSO (Inset).

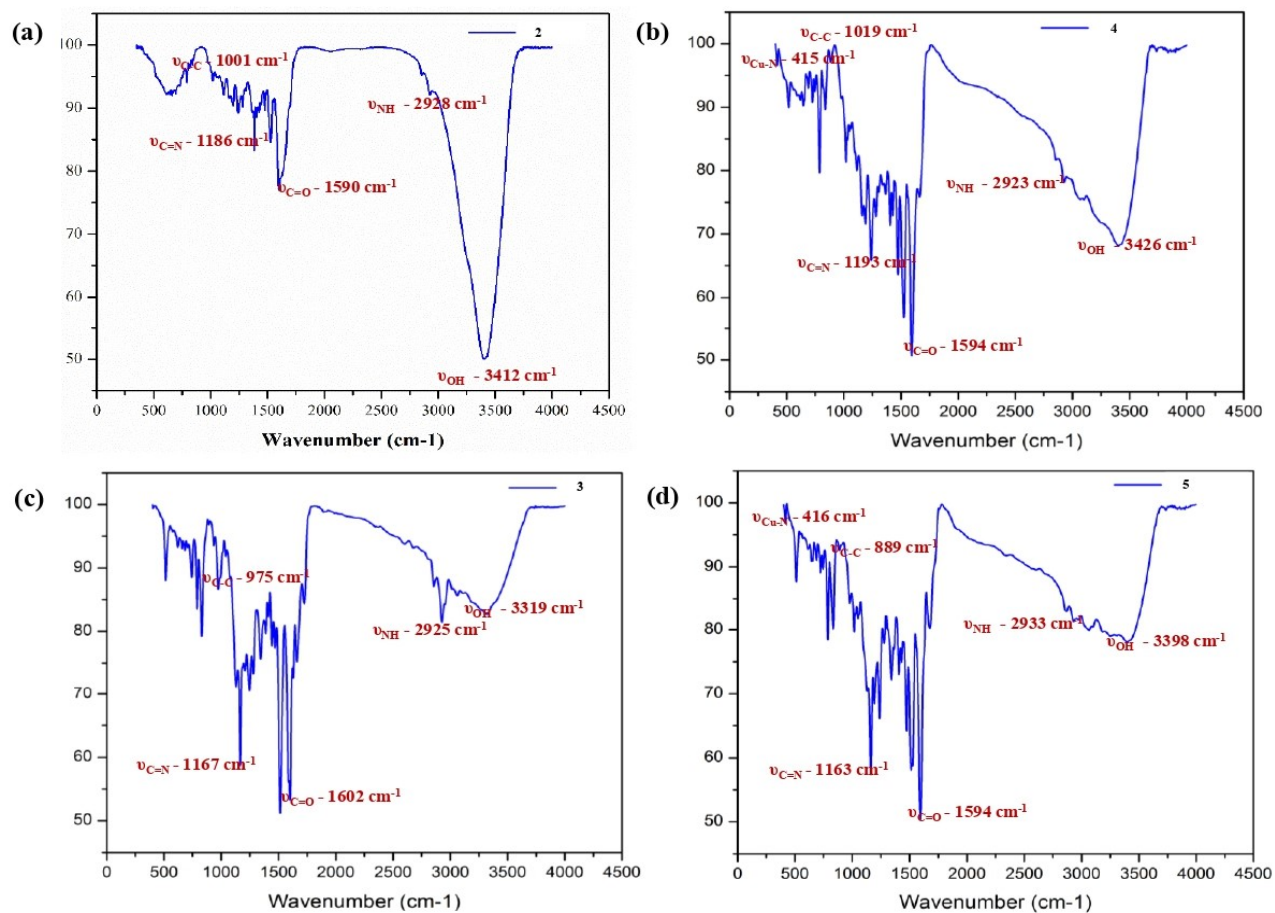

**Figure S9.** Solid state FT-IR spectra of (a) 2, (b) 4, (c) 3, (d) 5.

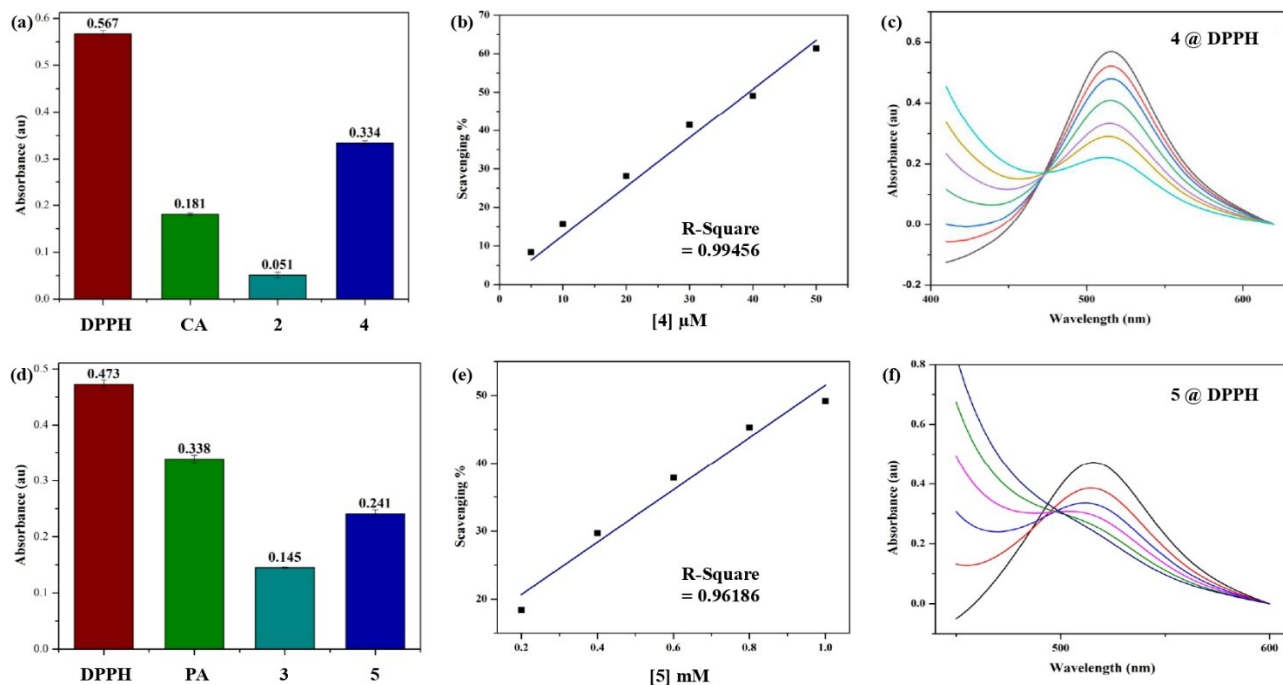

**Figure S10.** DPPH Radical scavenging assay. (a) & (d) Graphical representation of DPPH radical scavenging by CA, 2, 4 at 30  $\mu$ M and PA, 3, 5 at 1 mM. (b) & (e) Linear regression to determine the IC<sub>50</sub> values of DPPH scavenging by 4 and 5. (c) & (f) UV-Visible absorption spectra for DPPH scavenging by 4 (0  $\mu$ M - 80  $\mu$ M) and 5 (0 mM - 2.5 mM).

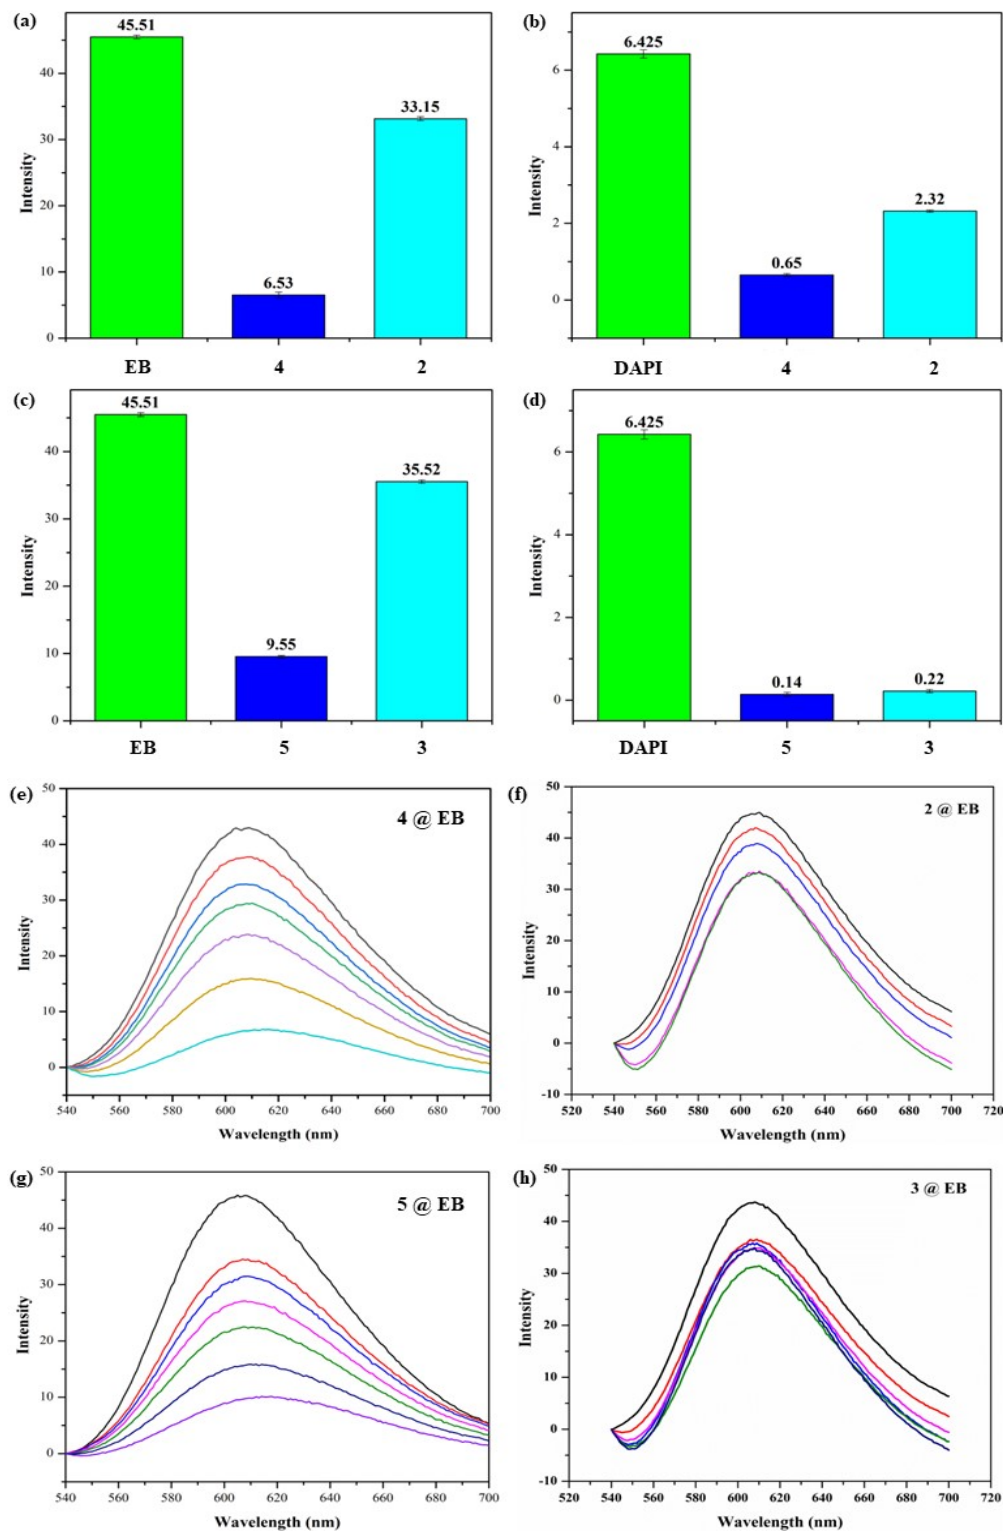

**Figure S11.** Dye displacement studies towards *ct*-DNA binding to determine the binding fashion. (a) & (c) Graphical representation of EB ([EB] - 10  $\mu$ M) displacement by 2, 4 at 35  $\mu$ M and 3, 5

at 15  $\mu\text{M}$ . (b) & (d) Graphical representation of DAPI ([DAPI] - 10 nM) displacement by **2**, **4** at 35  $\mu\text{M}$  and **3**, **5** at 15  $\mu\text{M}$ . (e) & (g) UV-Visible absorption spectra for EB displacement by **4** (0  $\mu\text{M}$  - 50  $\mu\text{M}$ ) and **5** (0  $\mu\text{M}$  - 30  $\mu\text{M}$ ). (f) & (h) UV-Visible absorption spectra for EB displacement by **2** (0  $\mu\text{M}$  - 50  $\mu\text{M}$ ) and **3** (0  $\mu\text{M}$  - 30  $\mu\text{M}$ ).

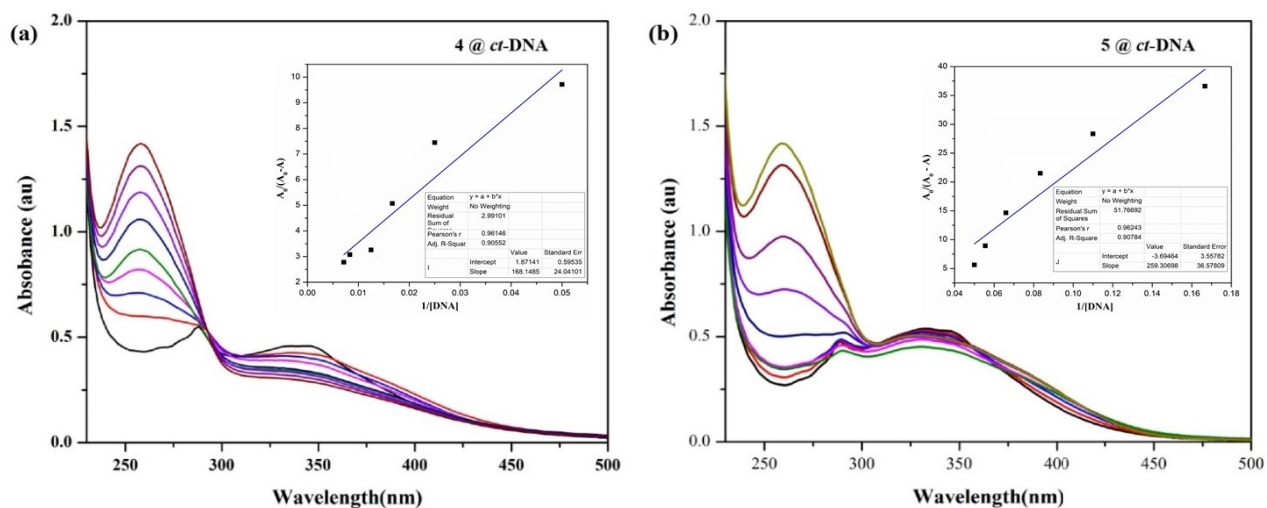

**Figure S12.** UV-visible absorbance studies towards ct-DNA binding to determine binding fashion. (a) & (b) UV-visible absorption spectra for ct-DNA binding ([**4**]/[**5**] - 20  $\mu\text{M}$ ) by ct-DNA (0 - 200  $\mu\text{M}$ ).

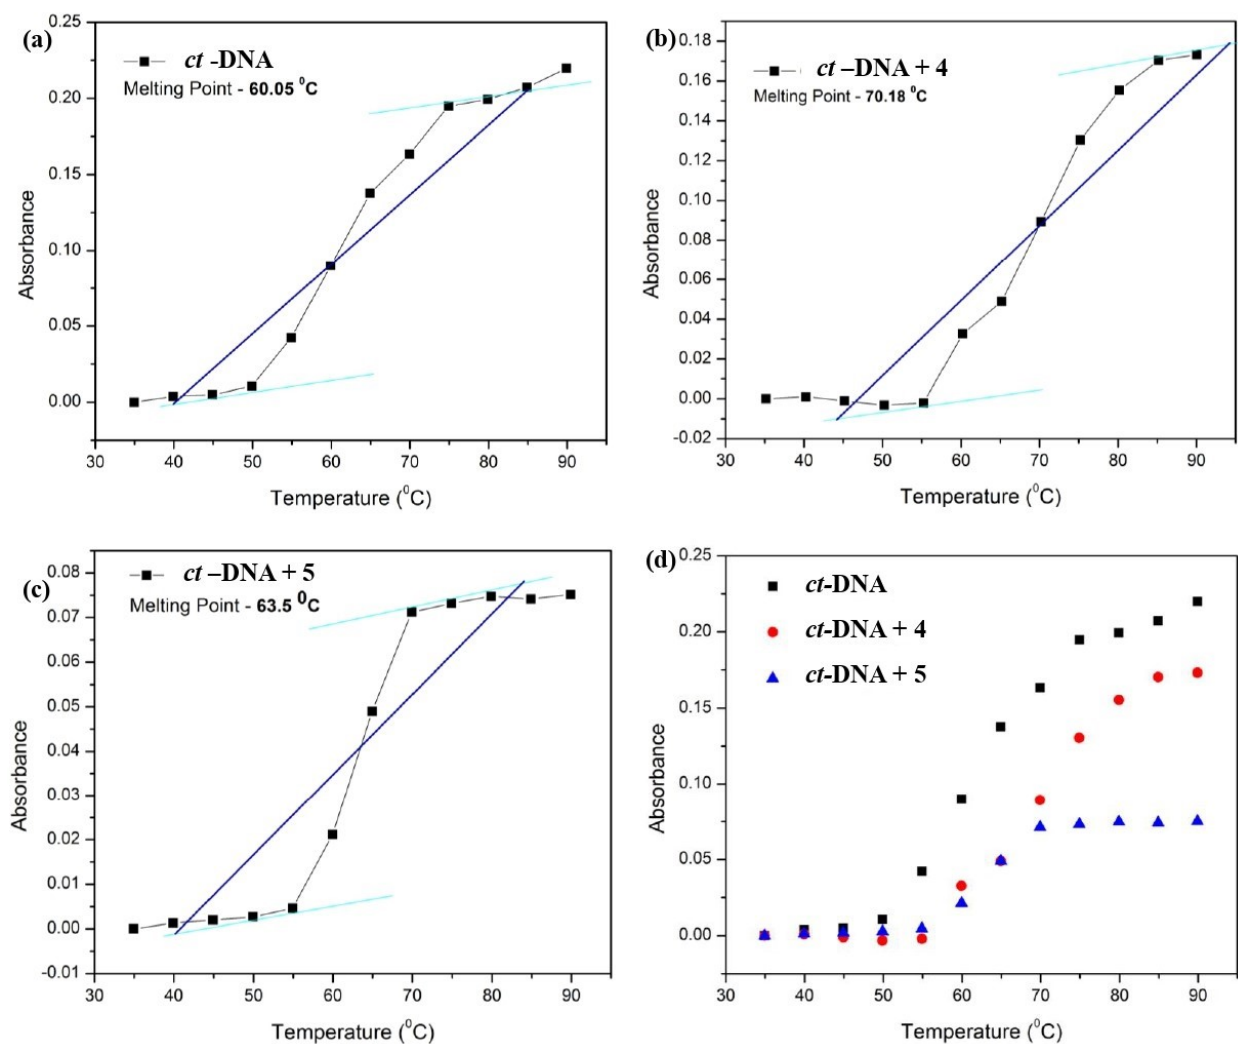

**Figure S13.** *ct*-DNA melting studies to determine binding fashion. **(a)** The melting profile of *ct*-DNA (100  $\mu$ M) was studied by a temperature-controlled UV-Visible spectrometer at 260 nm. **(b)** & **(c)** Melting profile of *ct*-DNA (100  $\mu$ M) in the presence of **4** (10  $\mu$ M) and **5** (10  $\mu$ M) at 260 nm. **(d)** combined representation of *ct*-DNA melting in the presence and absence of **4** & **5**.

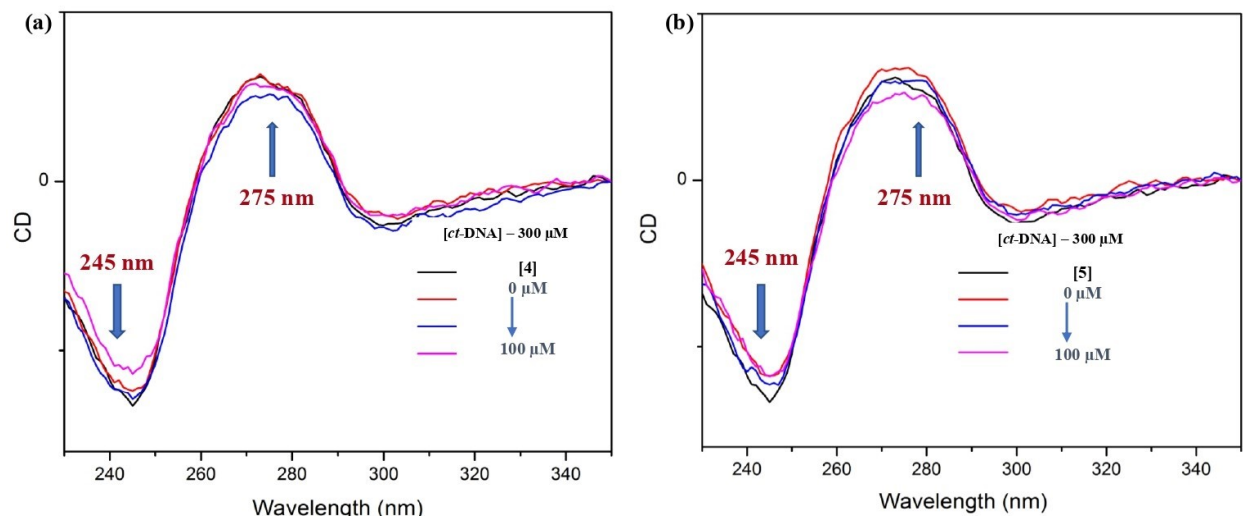

**Figure S14.** CD spectral analysis to determine *ct*-DNA binding fashion. (a) & (b) CD spectral representation of *ct*-DNA at 25 °C (220 nm - 350 nm, (*ct*-DNA)– 300 μM)) in presence of **4** (0 - 100 μM) and **5** (0 - 100 μM).

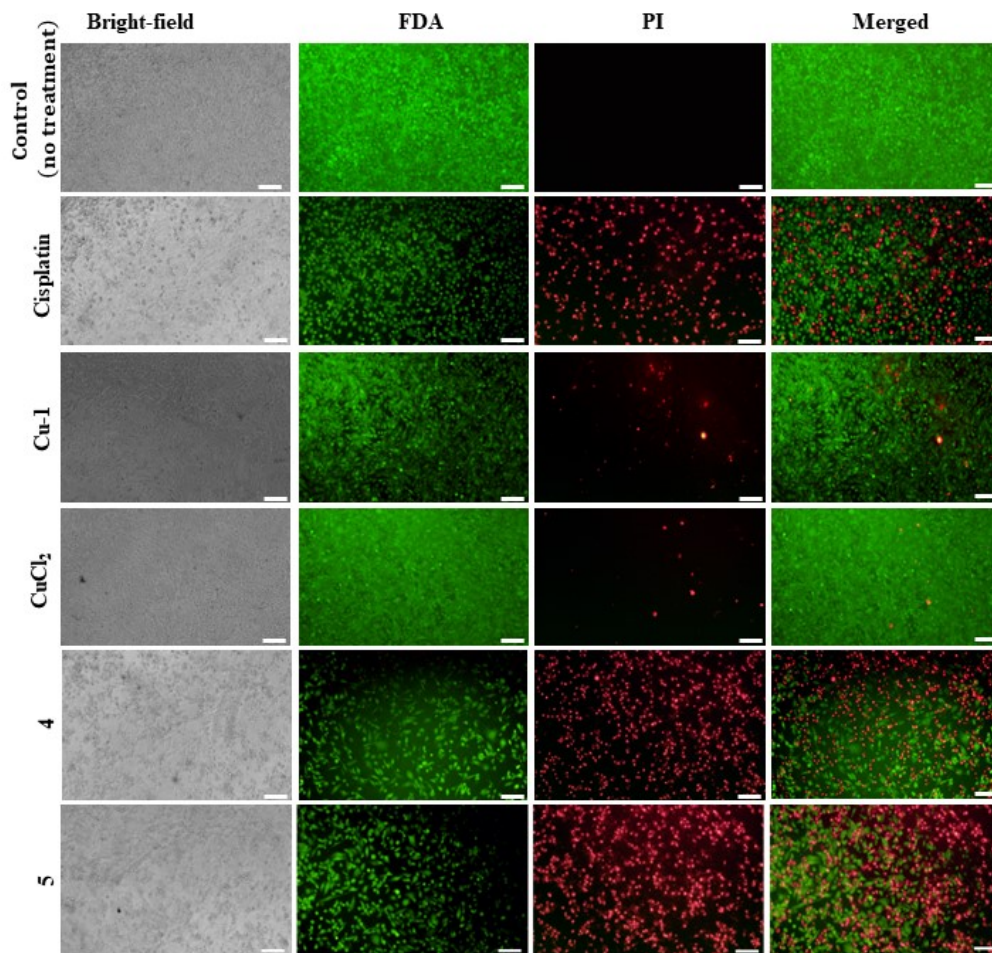

**Figure S15.** Live–dead imaging of 4T1 cells treated with 3  $\mu$ M of **4** and **5** for 24 h. Green fluorescence (FDA) corresponds to live cells, red fluorescence (PI) corresponds to dead cells, and merged images for co-localization of live and dead cells. Scale bar: 100  $\mu$ m.



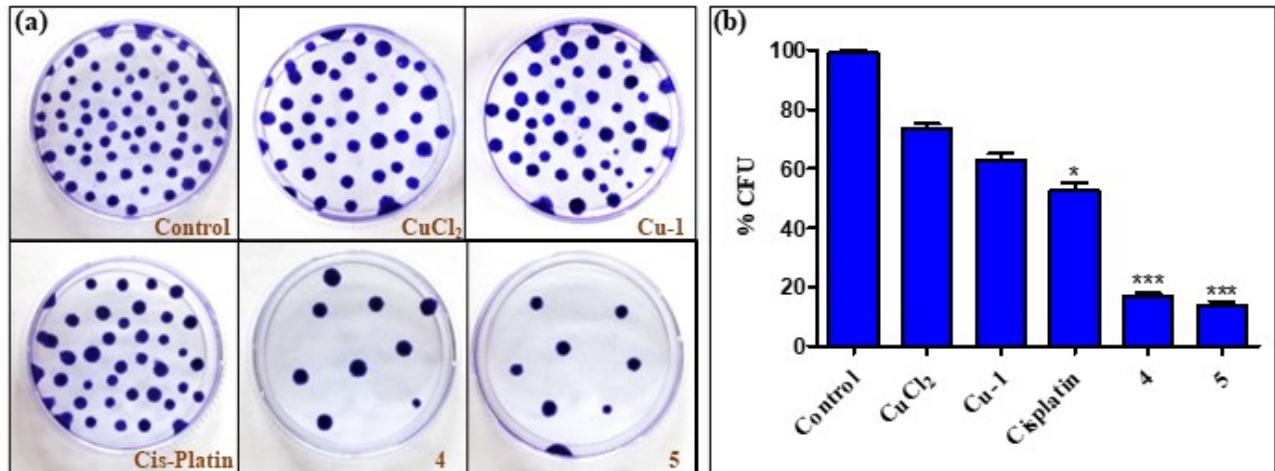

**Figure S16.** (a) Clonogenic assay in 4T1 cells to see the regrowth on post-treatment. (b) Graphical depiction of cell viability (%) in the clonogenic assay.

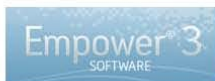

Instrument ID: ARDI067

Sample Name: RGF/4/01/004(Sno:0002)  
Vial: 3 Date Acquired: 12-06-2024 14:39:04 IST  
Injection Volume : 5.00 uL Date Processed: 12-06-2024 16:11:37 IST  
Column Name: Kromasil 100 C18,250x4.6mm,5.0µm Processing Method: 4\_PRO  
Column ID: LC-01316  
Result Id: 1193 Processed Channel Descr.: PDA 340.0 nm (DAD: Spectrum)  
Project Name: 2024\June\_2024\Development\RA Acq. Method Set: RGF\_067\_MTH\_01

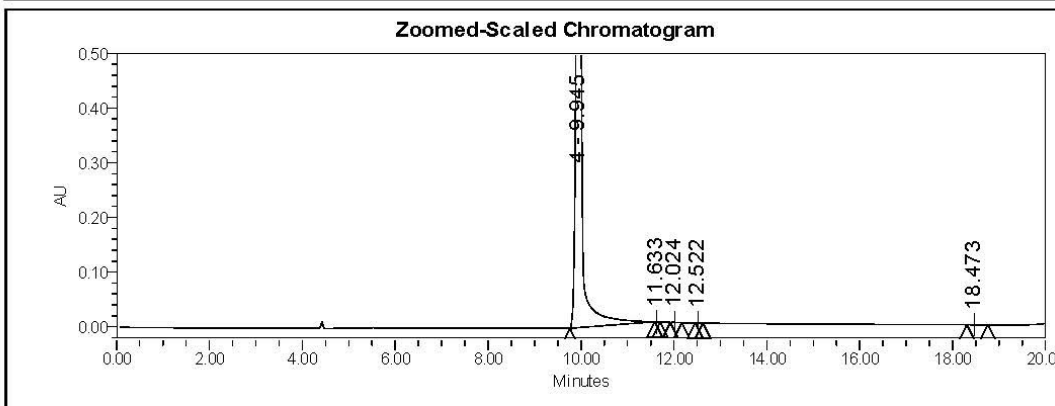

Peak Results

|     | RT     | Area    | Height (µV) | % Area | Int Type | RT Ratio | Name |
|-----|--------|---------|-------------|--------|----------|----------|------|
| 1   | 9.945  | 9987979 | 1358710     | 99.95  | BB       | 1.00     | 4    |
| 2   | 11.633 | 548     | 149         | 0.01   | BB       | 1.17     |      |
| 3   | 12.024 | 1548    | 193         | 0.02   | BB       | 1.21     |      |
| 4   | 12.522 | 664     | 135         | 0.01   | BB       | 1.26     |      |
| 5   | 18.473 | 2569    | 237         | 0.03   | BB       | 1.86     |      |
| Sum |        | 9993307 |             |        |          |          |      |

Figure S17. HPLC traces of 4.



Instrument ID: ARDI067

Sample Name: RGF/5/01/002(Sno:0003)  
Vial: 4 Date Acquired: 12-06-2024 15:01:11 IST  
Injection Volume : 5.00 uL Date Processed: 12-06-2024 16:14:45 IST  
Column Name: Kromasil 100 C18,250x4.6mm,5.0µm Processing Method: 5\_PRO  
Column ID: LC-01316  
Result Id: 1198 Processed Channel Descr.: PDA 340.0 nm (DAD: Spectrum)  
Project Name: 2024\June\_2024\Development\RA Acq. Method Set: RGF\_067\_MTH\_01

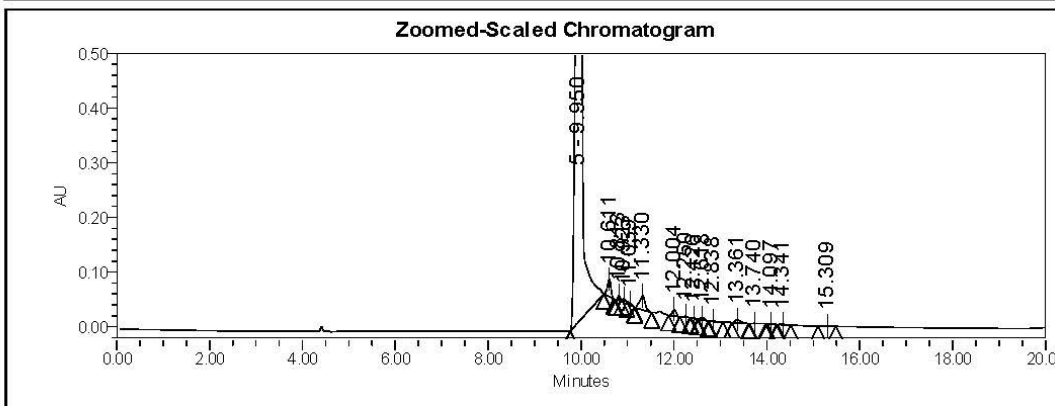

| Peak Results |        |          |             |        |          |          |      |
|--------------|--------|----------|-------------|--------|----------|----------|------|
|              | RT     | Area     | Height (µV) | % Area | Int Type | RT Ratio | Name |
| 1            | 9.950  | 17528388 | 2519869     | 96.46  | BB       | 1.00     | 5    |
| 2            | 10.611 | 169128   | 32196       | 0.93   | BB       | 1.07     |      |
| 3            | 10.813 | 24382    | 6941        | 0.13   | BB       | 1.09     |      |
| 4            | 10.923 | 10501    | 3132        | 0.06   | BB       | 1.10     |      |
| 5            | 11.059 | 15401    | 2964        | 0.08   | BB       | 1.11     |      |
| 6            | 11.330 | 215725   | 25575       | 1.19   | BB       | 1.14     |      |
| 7            | 12.004 | 71342    | 12855       | 0.39   | BB       | 1.21     |      |
| 8            | 12.250 | 13099    | 2175        | 0.07   | BB       | 1.23     |      |
| 9            | 12.426 | 4912     | 1106        | 0.03   | BB       | 1.25     |      |
| 10           | 12.618 | 28850    | 5133        | 0.16   | BB       | 1.27     |      |
| 11           | 12.838 | 9207     | 1513        | 0.05   | BB       | 1.29     |      |

| Peak Results |        |          |             |        |          |          |      |
|--------------|--------|----------|-------------|--------|----------|----------|------|
|              | RT     | Area     | Height (µV) | % Area | Int Type | RT Ratio | Name |
| 12           | 13.361 | 50823    | 6315        | 0.28   | BB       | 1.34     |      |
| 13           | 13.740 | 4680     | 518         | 0.03   | BB       | 1.38     |      |
| 14           | 14.097 | 2730     | 391         | 0.02   | BB       | 1.42     |      |
| 15           | 14.341 | 7613     | 922         | 0.04   | BB       | 1.44     |      |
| 16           | 15.309 | 14816    | 1374        | 0.08   | BB       | 1.54     |      |
| Sum          |        | 18171597 |             |        |          |          |      |

Figure S18. HPLC traces of 5.

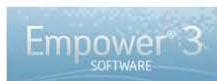

Instrument ID: ARDI067

Sample Name: RGF/Cu-1/02/001(Sno:0002)  
 Vial: 2 Date Acquired: 12-06-2024 14:16:58 IST  
 Injection Volume : 5.00 uL Date Processed: 12-06-2024 16:07:16 IST  
 Column Name: Kromasil 100 C18,250x4.6mm,5.0µm Processing Method: Cu-1\_PRO  
 Column ID: LC-01316  
 Result Id: 1188 Processed Channel Descr.: PDA 340.0 nm (DAD: Spectrum)  
 Project Name: 2024\June\_2024\Development\RA Acq. Method Set: RGF\_067\_MTH\_01

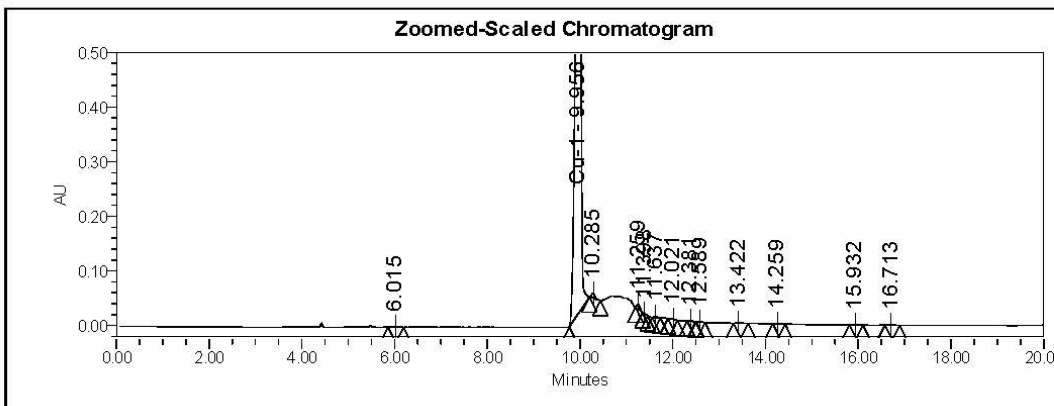

| Peak Results |        |          |             |        |          |          |      | Peak Results |        |          |             |        |          |          |      |
|--------------|--------|----------|-------------|--------|----------|----------|------|--------------|--------|----------|-------------|--------|----------|----------|------|
|              | RT     | Area     | Height (µV) | % Area | Int Type | RT Ratio | Name |              | RT     | Area     | Height (µV) | % Area | Int Type | RT Ratio | Name |
| 1            | 6.015  | 962      | 114         | 0.01   | BB       | 0.60     |      | 12           | 15.932 | 3557     | 429         | 0.03   | BB       | 1.60     |      |
| 2            | 9.956  | 11129299 | 1792639     | 98.69  | BB       | 1.00     | Cu-1 | 13           | 16.713 | 7325     | 872         | 0.06   | BB       | 1.68     |      |
| 3            | 10.285 | 48402    | 9343        | 0.43   | BB       | 1.03     |      | Sum          |        | 11277321 |             |        |          |          |      |
| 4            | 11.259 | 42480    | 9419        | 0.38   | BB       | 1.13     |      |              |        |          |             |        |          |          |      |
| 5            | 11.398 | 3314     | 1029        | 0.03   | BB       | 1.14     |      |              |        |          |             |        |          |          |      |
| 6            | 11.637 | 13124    | 2636        | 0.12   | BB       | 1.17     |      |              |        |          |             |        |          |          |      |
| 7            | 12.021 | 4976     | 800         | 0.04   | BB       | 1.21     |      |              |        |          |             |        |          |          |      |
| 8            | 12.381 | 6908     | 1306        | 0.06   | BB       | 1.24     |      |              |        |          |             |        |          |          |      |
| 9            | 12.589 | 6833     | 1309        | 0.06   | BB       | 1.26     |      |              |        |          |             |        |          |          |      |
| 10           | 13.422 | 7107     | 952         | 0.06   | BB       | 1.35     |      |              |        |          |             |        |          |          |      |
| 11           | 14.259 | 3033     | 374         | 0.03   | BB       | 1.43     |      |              |        |          |             |        |          |          |      |

Figure S19. HPLC traces of Cu-1.

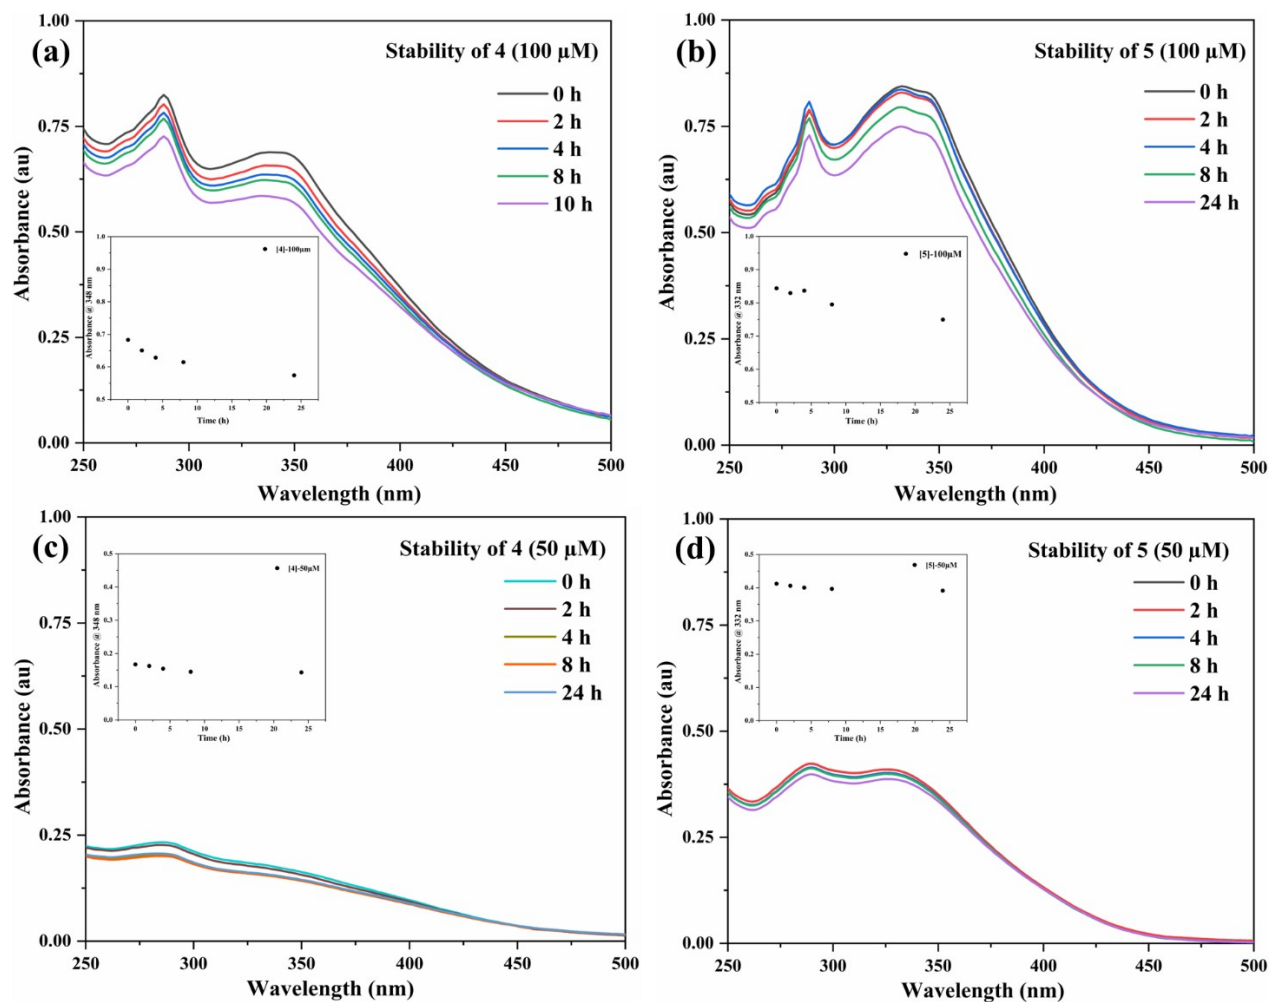

**Figure S20.** Stability of **4** & **5** in Tris-EDTA buffer (pH 7.8) (a) Stability of **4** (100 μM) in TE buffer (0.1% DMSO) over 0 to 24h (b) Stability of **5** (100 μM) in TE buffer (0.1% DMSO) over 0 to 24h. (c) Stability of **4** (50 μM) in TE buffer (0.1% DMSO) over 0 to 24h (d) Stability of **5** (50 μM) in TE buffer (0.1% DMSO) over 0 to 24h. (**Insets**) Change in absorbance with time at respective  $\lambda_{\text{max}}$  of **4** & **5** at 100 μM and 50 μM concentrations.
